# Supplementary material
Source: PubMed Central journal article supplement (PMC4126508)
Supplement: jf501330h_si_001.pdf [file jf501330h_si_001.pdf]

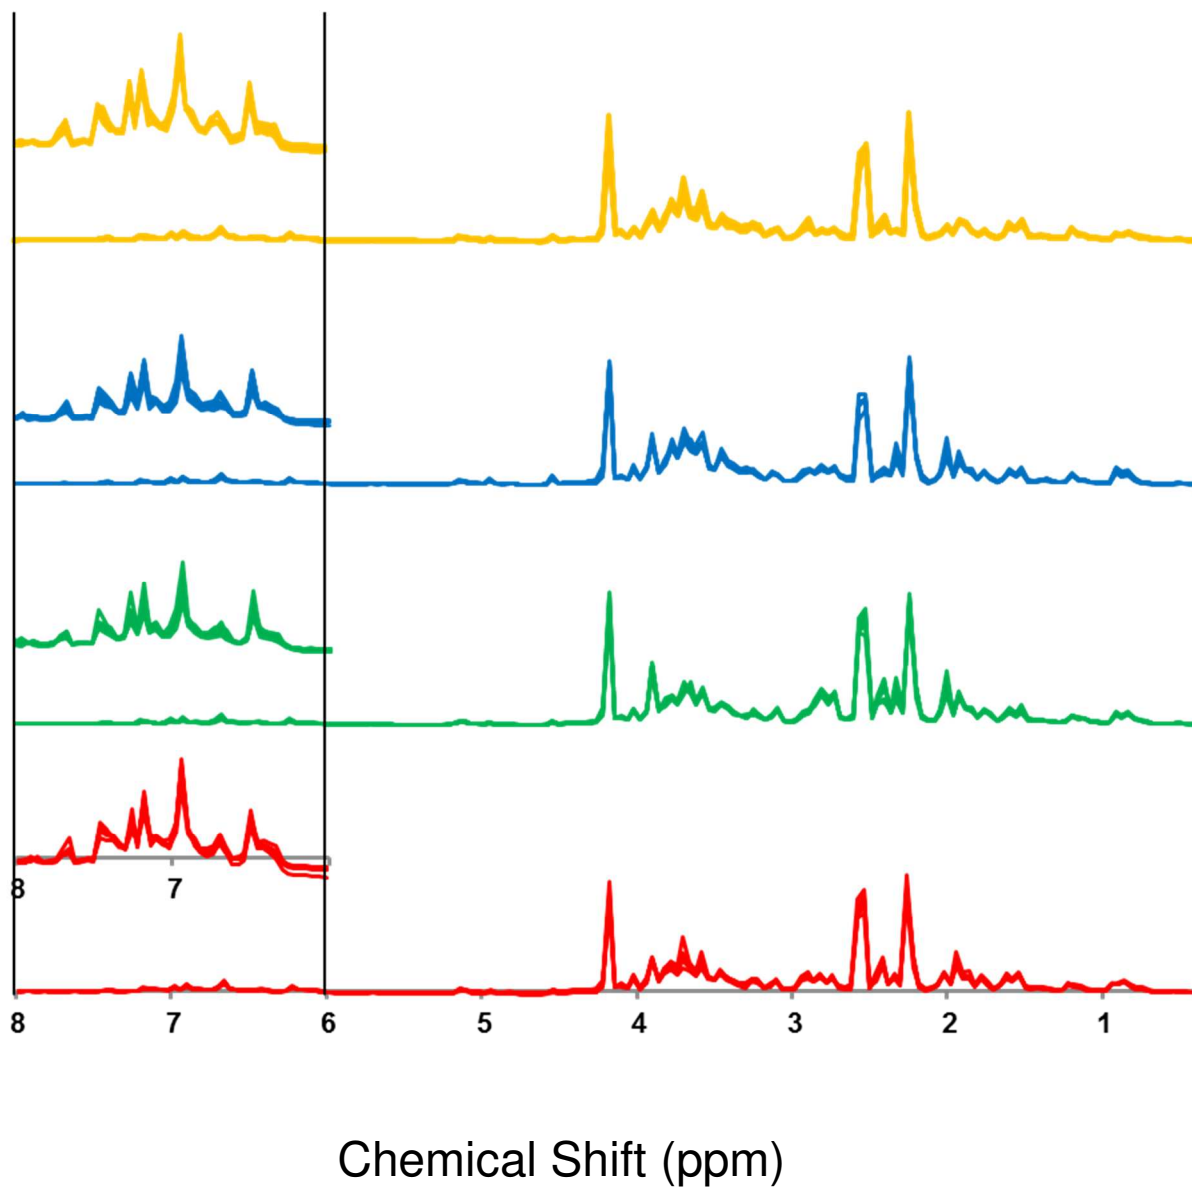

**Figure S1.** Overlaid 800 MHz <sup>1</sup>H NMR spectra of replicate polar extracts from day 7 potato wound periderm samples, color coded for Atlantic (red), Chipeta (green), Norkotah Russet (blue), and Yukon Gold (gold). Vertical expansions of the aromatic and multiple-bonded region between 6.0 and 8.0 ppm are shown in each inset.

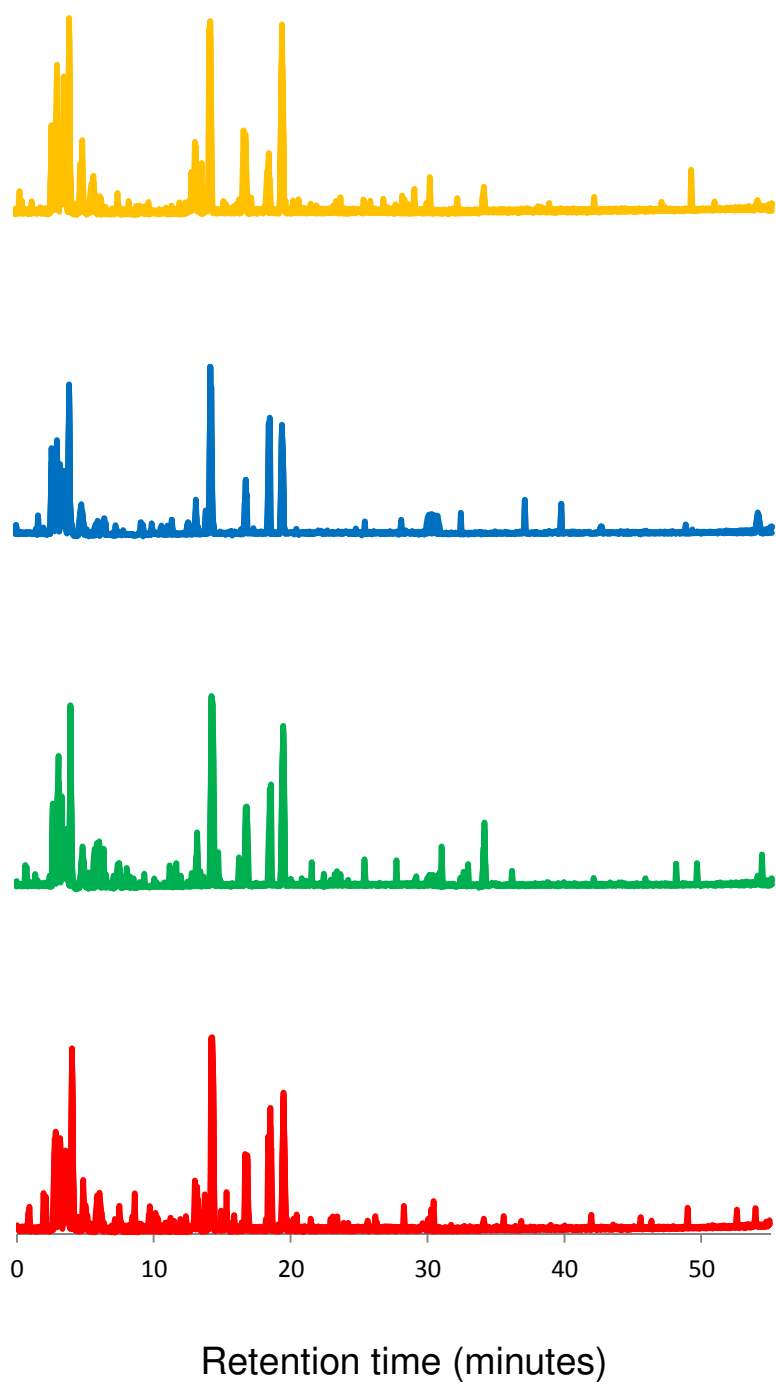

**Figure S2.** Overlaid LC-MS chromatograms of extracts for replicate polar extracts from day 7 potato wound periderm samples, color coded for Atlantic (red), Chipeta (green), Norkotah Russet (blue), and Yukon Gold (gold).
